# Supplementary material
Source: PubMed Central journal article supplement (PMC2757181)

## Supplemental data

### **Fig S1. Transfection efficiency of hCaMKIIN $\beta$ in HO-8910PM human ovarian cancer cells.**

HO-8910PM cells were transfected with hCaMKIIN $\beta$  for 24 h. Cells were harvested, fixed with 4% Paraformaldehyde, permeabilized with perm (Biolegend) and labeled by anti-His antibody (New England Biolabs).

### **Fig S2. hCaMKIIN $\beta$ inhibits human ovarian cancer cell proliferation through suppression of endogenous CaMKII activity.**

HO-8910PM cells were treated with KN-62 (Calbiochem, 10 $\mu$ M) for 5 h and then transfected with hCaMKIIN $\beta$  or mock vector and cultured for 48h. Cell Proliferation was determined by MTT assay. *Bars*, SE.

**Fig S3.** Detection of hCaMKIIN $\beta$ -induced apoptosis in HO-8910PM cells by transmission electron microscopy analysis. Stably transfected HO-8910PM cells were cultured for 48 h and then were visualized under transmission electron microscopy. Bar=5 $\mu$ m.

### **Fig S4. Quantification of hCaMKIIN $\beta$ -induced target protein expression in HO-8910PM human ovarian cancer cells.**

HO-8910PM cells were collected 24, 48, and 72h post-transfection with hCaMKIIN $\beta$  for Western blot analysis with the indicated antibodies. A, p53 expression in Fig. 6A was performed quantitative analysis. B, p-Akt (left) and p-HDM2 (right) expression in Fig. 6B was performed quantitative analysis. \*,  $P < 0.01$  vs. mock.

### **Fig S5. Assay for OVCAR-3 human ovarian cancer cell proliferation by MTT assay.**

OVCAR-3 cells were transfected with pKIIN $\beta$  or mock vectors, and then stable transfectants were obtained by G418 selection. The expression of hCaMKIIN $\beta$  was confirmed by Western blot analysis using anti-hCaMKIIN $\beta$  polyclonal antibody. An 11-kDa protein band was prominent in hCaMKIIN $\beta$ -transfected cells but not in mock-transfected or parental cells. The proliferation of stably transfected OVCAR-3 cells was examined by MTT assay. *Bars*, SE.

Figure S1

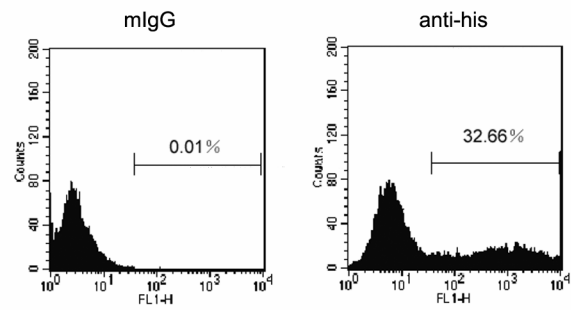

Figure S2

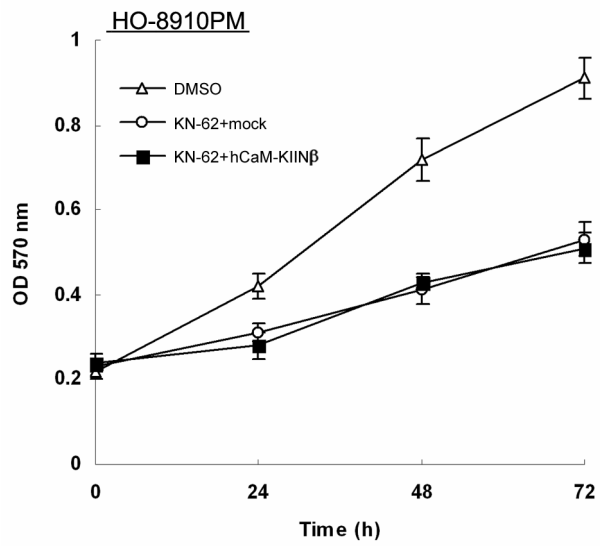

Figure S3

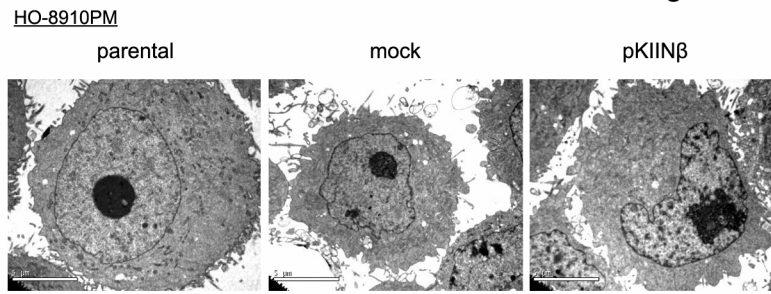

Figure S4

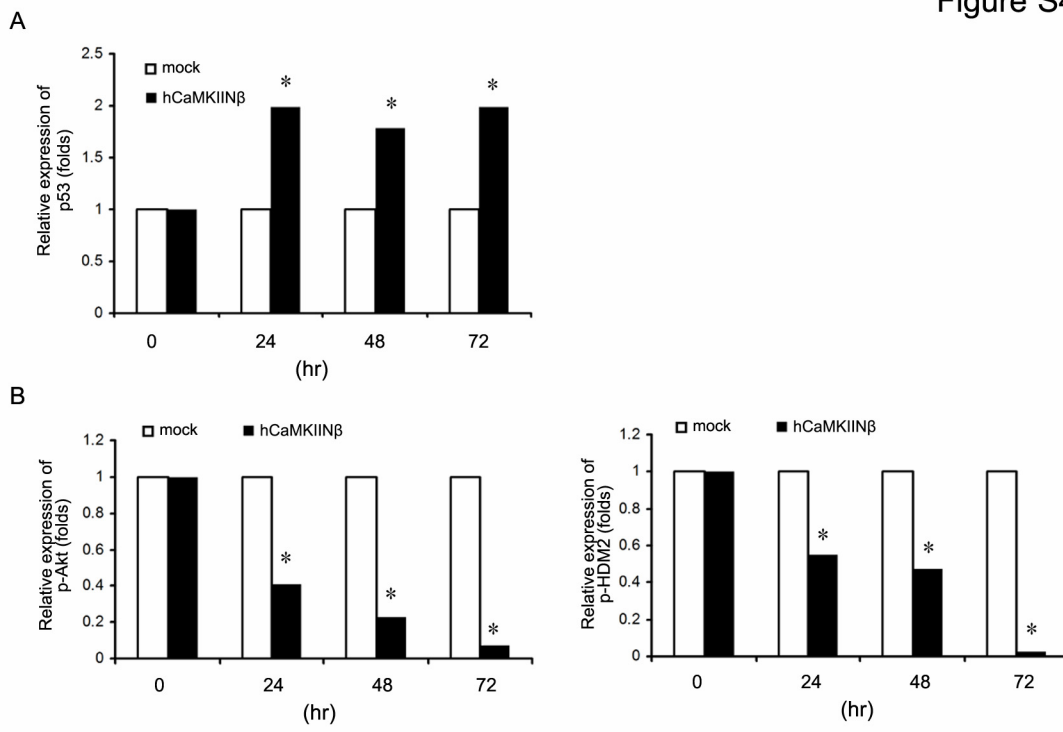

Figure S5

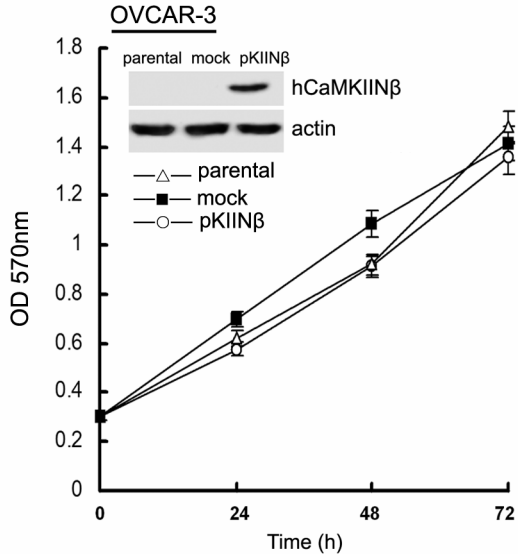

Supplement: supp_M109.028621_jbc.M109.028621-1.pdf [file supp_M109.028621_jbc.M109.028621-1.pdf]
